# Supplementary material
Source: PubMed Central journal article supplement (PMC3190792)
Supplement: supp_M110.193870_jbc.M110.193870-1.pdf [file supp_M110.193870_jbc.M110.193870-1.pdf]

## SUPPLEMENTAL DATA

Table S1: Yeast Strains

| Strain  | Genotype                                                                                                       | Reference               |
|---------|----------------------------------------------------------------------------------------------------------------|-------------------------|
| BY4733  | <i>MATa his3Δ200 trp1Δ63 leu2Δ0 met15Δ0 ura3Δ0</i>                                                             |                         |
| rna14-1 | <i>MATa ura3-1 trp1-1 ade2-1 leu2-3,112 his3-11,15 rna14-1</i>                                                 | Minveill-Sebastia, 1994 |
| AA1     | <i>MATa ura3-1 trp1-1 ade2-1 leu2-3,112 his3-11,15 rna14-1 SUA7-TAP, TRP<sup>+</sup></i>                       | This study              |
| AA2     | <i>MATa ade1/ade2 lys2 ura3-52 pap1-1 SUA7-TAP, TRP<sup>+</sup></i>                                            | This study              |
| pcf11-2 | <i>MATa ura3-1 trp1□ ade2-1 leu2-3,112 his3-11,15 pcf11-□::TRP1/pEL36-pcf11-2</i>                              | Amrani, 1997            |
| NAH12   | <i>MATa ura3-1 trp1□ ade2-1 leu2-3,112 his3-11,15 pcf11-□::TRP1/pEL36-pcf11-2 SUA7-TAP, TRP<sup>+</sup></i>    | This study              |
| hrp1-5  | <i>MATa cup1Δ ura3 his3 trp1 lys2 ade2 leu2 hrp1::HIS3[pRS315-hrp1-L205S (LEU2)]</i>                           | Kessler, 1997           |
| NAH13   | <i>MATa cup1Δ ura3 his3 trp1 lys2 ade2 leu2 hrp1::HIS3[pRS315-hrp1-L205S (LEU2)] SUA7-TAP, TRP<sup>+</sup></i> | This study              |
| pap1-1  | <i>MATa ade1/ade2 lys2 ura3-52 pap1-1</i>                                                                      | Patel, 1992             |
| SRR7    | <i>MATa his3Δ200 trp1Δ63 leu2Δ0 met15Δ0 ura3Δ0 RNA14-TAP, URA<sup>+</sup></i>                                  | This study              |
| SRR8    | <i>MATa his3Δ200 trp1Δ63 leu2Δ0 met15Δ0 ura3Δ0 PCF11-TAP, URA<sup>+</sup></i>                                  | This study              |
| SAM50   | <i>MATa his3Δ200 trp1Δ63 leu2Δ0 met15Δ0 ura3Δ0, RNA14-13xMyc, TRP<sup>+</sup></i>                              | This study              |
| SAM51   | <i>MATa his3Δ200 trp1Δ63 leu2Δ0 met15Δ0 ura3Δ0, RNA15-13xMyc, TRP<sup>+</sup></i>                              | This study              |
| SAM52   | <i>MATa his3Δ200 trp1Δ63 leu2Δ0 met15Δ0 ura3Δ0, PCF11-13xMyc, TRP<sup>+</sup></i>                              | This study              |
| SAM53   | <i>MATa his3Δ200 trp1Δ63 leu2Δ0 met15Δ0 ura3Δ0, CLP1-13xMyc, TRP<sup>+</sup></i>                               | This study              |
| SAM54   | <i>MATa his3Δ200 trp1Δ63 leu2Δ0 met15Δ0 ura3Δ0, HRP1-13xMyc, TRP<sup>+</sup></i>                               | This study              |
| SAM55   | <i>MATa his3Δ200 trp1Δ63 leu2Δ0 met15Δ0 ura3Δ0, PAPI1-13xMyc, TRP<sup>+</sup></i>                              | This study              |
| SAM56   | <i>MATa his3Δ200 trp1Δ63 leu2Δ0 met15Δ0 ura3Δ0, SUA7-3xHA, HIS<sup>+</sup></i>                                 | This study              |
| SAM58   | <i>MATa his3Δ200 trp1Δ63 leu2Δ0 met15Δ0 ura3Δ0, SUA7-3xHA, HIS<sup>+</sup>, RNA14-13xMyc, TRP<sup>+</sup></i>  | This study              |
| SAM59   | <i>MATa his3Δ200 trp1Δ63 leu2Δ0 met15Δ0 ura3Δ0, SUA7-3xHA, HIS<sup>+</sup>, RNA15-13xMyc, TRP<sup>+</sup></i>  | This study              |

TFIIB forms a complex with CF1 subunits and Pap1

|         |                                                                                         |               |
|---------|-----------------------------------------------------------------------------------------|---------------|
| SAM60   | <i>MATa his3Δ200 trp1Δ63 leu2Δ0 met15Δ0 ura3Δ0, SUA7-3xHA, HIS+, PCF11-13xMyc, TRP+</i> | This study    |
| SAM61   | <i>MATa his3Δ200 trp1Δ63 leu2Δ0 met15Δ0 ura3Δ0, SUA7-3xHA, HIS+, CLP1-13xMyc, TRP+</i>  | This study    |
| SAM62   | <i>MATa his3Δ200 trp1Δ63 leu2Δ0 met15Δ0 ura3Δ0, SUA7-3xHA, HIS+, HRP1-13xMyc, TRP+</i>  | This study    |
| SAM63   | <i>MATa his3Δ200 trp1Δ63 leu2Δ0 met15Δ0 ura3Δ0, SUA7-3xHA, HIS+, PAPI-13xMyc, TRP+</i>  | This study    |
| YMH14   | <i>MATα cyc1-5000 cyc7-67 ura3-52 leu2-3,112 cyh2</i>                                   | Pinto, 1994   |
| YMH124  | <i>MATα cyc1-5000 cyc7-67 ura3-52 leu2-3,112 cyh2 sua7-1</i>                            | Pinto, 1994   |
| SAM64   | <i>MATα cyc1-5000 cyc7-67 ura3-52 leu2-3,112 cyh2 sua7-1, SUA7-3xHA, KANMX</i>          | This study    |
| SAM68   | <i>MATa his3Δ200 trp1Δ63 leu2Δ0 met15Δ0 ura3Δ0, TBP-3xHA, HIS+</i>                      | This study    |
| YMH804  | <i>MATa ura3 leu2 trp1 his3 ade2 ade3 can1 kin28Δ::trp1 (pKIN28-HA)</i>                 | Hampsey's lab |
| SHY407B | <i>MATα ade2Δ his3Δ200 leu2Δ0 met15Δ0 trp1Δ ura3Δ0 RPB9-Flag1-TAP::TRP1</i>             | Rani, 2004    |

**REFERENCES**

- Lionel Minvielle-Sebastia, Pascal J. Preker, Walter Keller. (1994) *Science* **266**, 1702-1705.  
 Nadia Amranie et al. (1997) *Mol Cell Bio* **17**, 1102-1109.  
 Marco M. Kessler et al. (1997) *Genes & Development* **11**, 2545-2556.  
 Daksha Patel and J. Scott Butler. (1992) *Mol Cell Bio* **12**, 3297-3304.  
 Pinto I, Wu WH, Na JG, Hampsey M. (1994) *J Biol Chem* **269**, 30569-30573.  
 P. Geetha Rani, Jeffrey A. Ranish, Steven Hahn (2004) *Mol Cell Bio* **24**,1709–1720

TFIIB forms a complex with CF1 subunits and Pap1

Table S2: Primers

|                         |                                                                           |
|-------------------------|---------------------------------------------------------------------------|
| <i>INO1</i> P1          | GAACCCGACAACAGAACAAGC                                                     |
| <i>INO1</i> T1          | GTTGAGGTAGATGCGAGAAAGTG                                                   |
| <i>INO1</i> F1          | GATATCCAGAATTTCAAAGAAGAAAAC                                               |
| <i>INO1</i> R1          | TATTCTGCGGTGAACCATTAATATAG                                                |
| <i>INO1</i> A           | GAAATATGCGGAGGCCAAG                                                       |
|                         | AACCCGACAAACAGAACAAGC                                                     |
| <i>INO1</i> B           | TTGCACCATCCCATTTAAGT                                                      |
|                         | TGGATCTGATATCACCTATAACTTCG                                                |
| <i>INO1</i> C           | AGTGGCCTATGCGTCGAGAG                                                      |
|                         | ATTGATGCAGTTATTGGCTCTC                                                    |
| <i>INO1</i> D           | GATATCCAGAATTTCAAAGAAGAAAAC                                               |
|                         | TATTCTGCGGTGAACCATTAATATAG                                                |
| <i>MET16</i> P1         | TTTGCTGGCCTTAGTTTTGATC                                                    |
| <i>MET16</i> T1         | GGAAGATGGAAGGGCAAGG                                                       |
| <i>MET16</i> F1         | CGAACTCTCTTGTGTAAATATCTGG                                                 |
| <i>MET16</i> R1         | CGATGTGCAGGTTCCACTTTG                                                     |
| <i>MET16</i> B          | CACAAGAACAGTTGGATCATTGG                                                   |
|                         | AAAGTTTGTGGGAAATGGTGC                                                     |
| <i>MET16</i> C          | CAATTGGACGTTTCGAGCAGG                                                     |
|                         | CATCTTGCTTTAAAAATTGCG                                                     |
| <i>MET16</i> D          | ATTACCATTCCACACAACCCG                                                     |
|                         | TTCTCGTACAGCGCGAATTC                                                      |
| F2-Myc-<br><i>RNA14</i> | TTTTAAATGATCAAGTAGAGATTCCAACAGTTGAGAGCA<br>CCAAGTCAGGTCGGATCCCCGGGTAAATTA |

TFIIB forms a complex with CF1 subunits and Pap1

|                            |                                                                             |
|----------------------------|-----------------------------------------------------------------------------|
| R1- Myc-<br><i>RNA14</i>   | AGATGTGTTGGTATAAATATTCATATATACCTATTTATTA<br>ACGTAATGTTAGAATTCGAGCTCGTTTAAAC |
| F2- Myc-<br><i>RNA15</i>   | CTATTTGGGACTTAAAACAAAAGCATTAAAGGGGAGAA<br>TTTGGTGCAATTCGGATCCCCGGGTAAATTA   |
| R1- Myc-<br><i>RNA15</i>   | ATCATTGCGGAACCGCATTNTTTTTTTGTATTTTGCCTCC<br>CTAGTTTCAGAATTCGAGCTCGTTTAAAC   |
| F2- Myc-<br><i>PCF11</i>   | CTAATAGTGCCAAGGTCGGTTTGGATGACTTAAAGAAAT<br>TGGTCACAAAACGGATCCCCGGGTAAATTA   |
| R1- Myc-<br><i>PCF11</i>   | TAATATAATATATAGTTATTAATTTAAATGTATATATGC<br>AGTTCTGCTCGAATTCGAGCTCGTTTAAAC   |
| F2- Myc-<br><i>HRP1</i>    | GTCGCGGTGGATAACAATAGACGTAATAATGGCTACCATC<br>CATATAATAGGCGGATCCCCGGGTAAATTA  |
| R1- Myc-<br><i>HRP1</i>    | TGAATTATACAAGAAAACNTTCTCTAGTTTTCTACACTT<br>TTCTTTTTTGAATTCGAGCTCGTTTAAAC    |
| F2- Myc-<br><i>CLP1</i>    | GCCGACTTCCCAGCAAGGCGATGATTCTAACTTCATATA<br>GATATTTAGAGCGGATCCCCGGGTAAATTA   |
| R2- Myc-<br><i>CLP1</i>    | TACGATATTTGTATGGATTTGATATAAGGCTCTTGAACA<br>GATAATTTTACGAATTCGAGCTCGTTTAAAC  |
| F2- Myc-<br><i>PAP1</i>    | CTGCTTCAGGTGACAACATCAATGGCACAACCGCAGCTG<br>TTGACGTAAACCGGATCCCCGGGTAAATTA   |
| R1- Myc-<br><i>PAP1</i>    | TGACTGATTAACCTATATTAATAAACTATTCAACTATAA<br>ATAGGAATGTCGAATTCGAGCTCGTTTAAAC  |
| F2-HA-<br><i>TFIIB</i>     | TTGCTAATGGTGTAGTGTCTTTGGATAACTTACCGGGCG<br>TTGAAAAGAAACGGATCCCCGGGTAAATTA   |
| R1-HA-<br><i>TFIIB</i>     | CACGAGTACCCGTGCTTCTTGTTCCTATAATTTACTGTTT<br>TATCACTTCAGAATTCGAGCTCGTTTAAAC  |
| F2 HA-<br><i>TBP</i>       | ACCAAGCTTTTGAAGCTATATACCCTGTGCTAAGTGAATTTAGAAAAAT<br>GCGGATCCCCGGGTAAATTA   |
| R1 HA-<br><i>TBP</i>       | AAATGGAACAAATAGAAAACNTTTTTTCTTTTCGTCTACTCCTTCCCC<br>AGAATTCGAGCTCGTTTAAAC   |
| <i>RNA15</i> -<br>Myc-Diag | TCCAGGCCGCAAGAAGAG                                                          |
| <i>RNA14</i> -<br>Myc-Diag | AAGAGACTCAGAGCTTCCAACAG                                                     |
| <i>PCF11</i> -<br>Myc-Diag | GTCCAATTTGTAAGGAAACCG                                                       |
| <i>HRP1</i> -<br>Myc-Diag  | AGCAAGATTCAAATGCCACTC                                                       |
| <i>PAP1</i> -<br>Myc-Diag  | GTAACAGATGAAAATAAAGAGGAAGAA                                                 |
| <i>CLP1</i> -<br>Myc-Diag  | TTGAGTCCTTATGCTATTGGTGTT                                                    |
| TFIIB-HA-<br>Diag          | CCGATGCAAGTCACTACTTCTG                                                      |
| Myc-tag-                   | CAAGTCTTCCTCGGAGATTAGC                                                      |

TFIIB forms a complex with CF1 subunits and Pap1

|                        |                          |
|------------------------|--------------------------|
| Diag                   |                          |
| HA-tag-Diag            | GGTAGAGGTGTGGTCAATAAGAGC |
| <i>TBP</i> -HA<br>Diag | ACCGGTGCAAAAAGTGAGG      |

TFIIB forms a complex with CF1 subunits and Pap1

**SUPPLEMENTARY DATA-FIGURE LEGENDS**

Figure S1

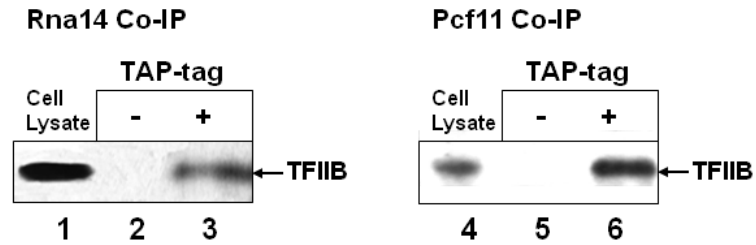

**Figure S1. Association of CF1 subunits with TFIIB is not mediated by the HA epitope tag.** Affinity purification of untagged TFIIB was performed on IgG Sepharose beads from a strain harboring TAP-tagged CF1 subunits Rna14 and Pcf11 as described in El Kaderi et al. (1). Purified samples were subjected to SDS-PAGE followed by Western blot analysis with anti-TFIIB antibodies.

TFIIB forms a complex with CF1 subunits and Pap1

Figure S2

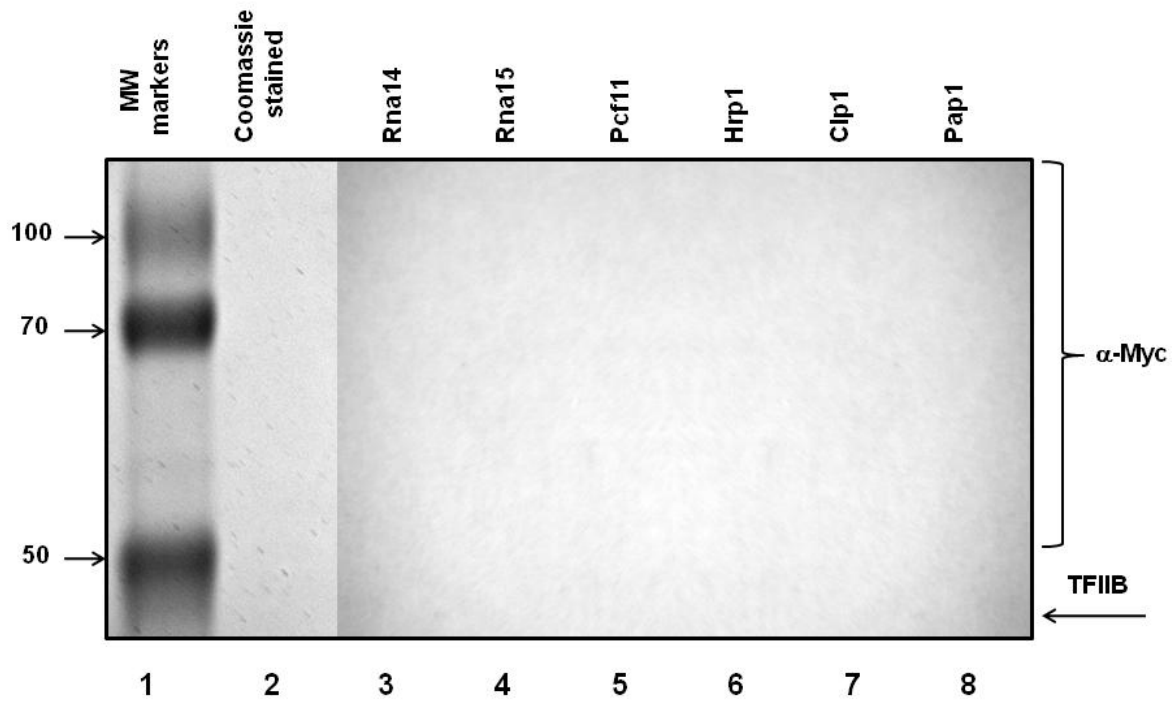

**Figure S2. Association of CF1 subunits and poly(A) polymerase with TFIIB is not mediated by anti-HA beads.** Affinity purification of untagged TFIIB was performed on anti-HA beads from a strain harboring Myc-tagged CF1 subunits and poly(A) polymerase as described in Experimental Procedures. Purified samples were subjected to SDS-PAGE followed by Western blot analysis with anti-TFIIB and anti-Myc antibodies. Lane 1 displays molecular weight marker proteins and lane 2 represents imperial Coomassie staining the eluate from an anti-HA affinity column.

TFIIB forms a complex with CF1 subunits and Pap1

Figure S3

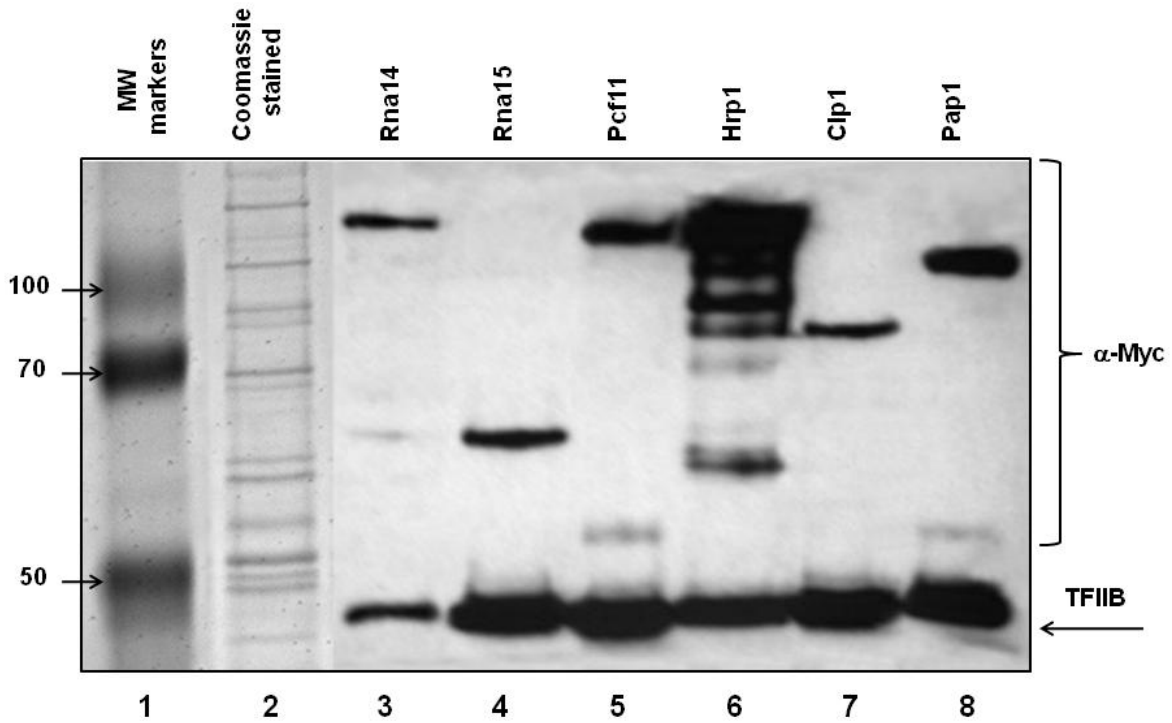

**Figure S3. CF1 subunits and poly(A) polymerase copurification with TFIIB is MNase resistant.** Prior to affinity purification, samples were digested with 300 units of MNase as described in Experimental Procedures. Affinity purifications were performed for HA-tagged TFIIB from a strain harboring Myc-tagged CF1 subunits and poly(A) polymerase as described in Experimental Procedures. Purified samples were subjected to SDS-PAGE analysis and followed by Western blot analysis, which was performed with anti-HA and anti-Myc antibodies. Lane 1 displays molecular weight marker proteins and lane 2 represents imperial Coomassie staining the eluate from an anti-HA affinity column.



TFIIB forms a complex with CF1 subunits and Pap1

Figure S4

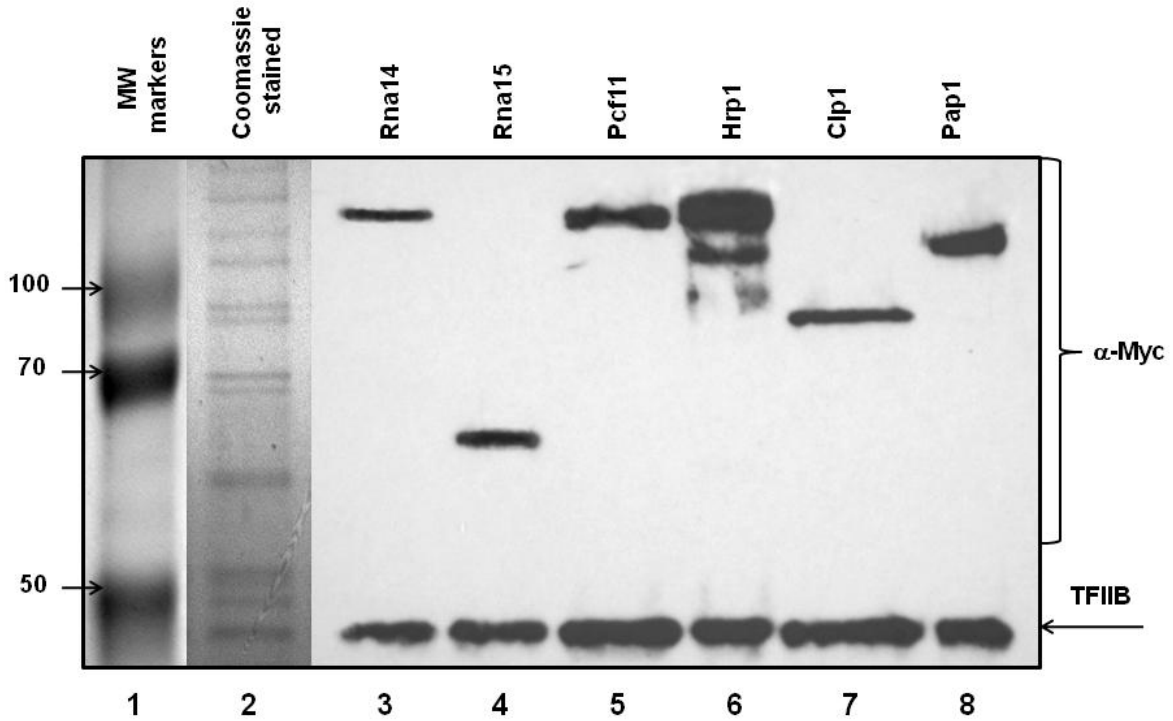

**Figure S4. TFIIB interaction with CF1 subunits and poly(A) polymerase is stable at 500 mM KCl during affinity purification.** Affinity purifications were performed for HA-tagged TFIIB in a strain harboring Myc-tagged CF1 subunits and poly(A) polymerase as described in Experimental Procedures in the presence of 500 mM KCl. Purified samples were subjected to SDS-PAGE analysis followed by Western blot analysis performed with anti-HA and anti-Myc antibodies. Lane 1 displays molecular weight marker proteins and lane 2 represents imperial Coomassie staining the eluate from an anti-HA affinity column.

TFIIB forms a complex with CF1 subunits and Pap1

Figure S5

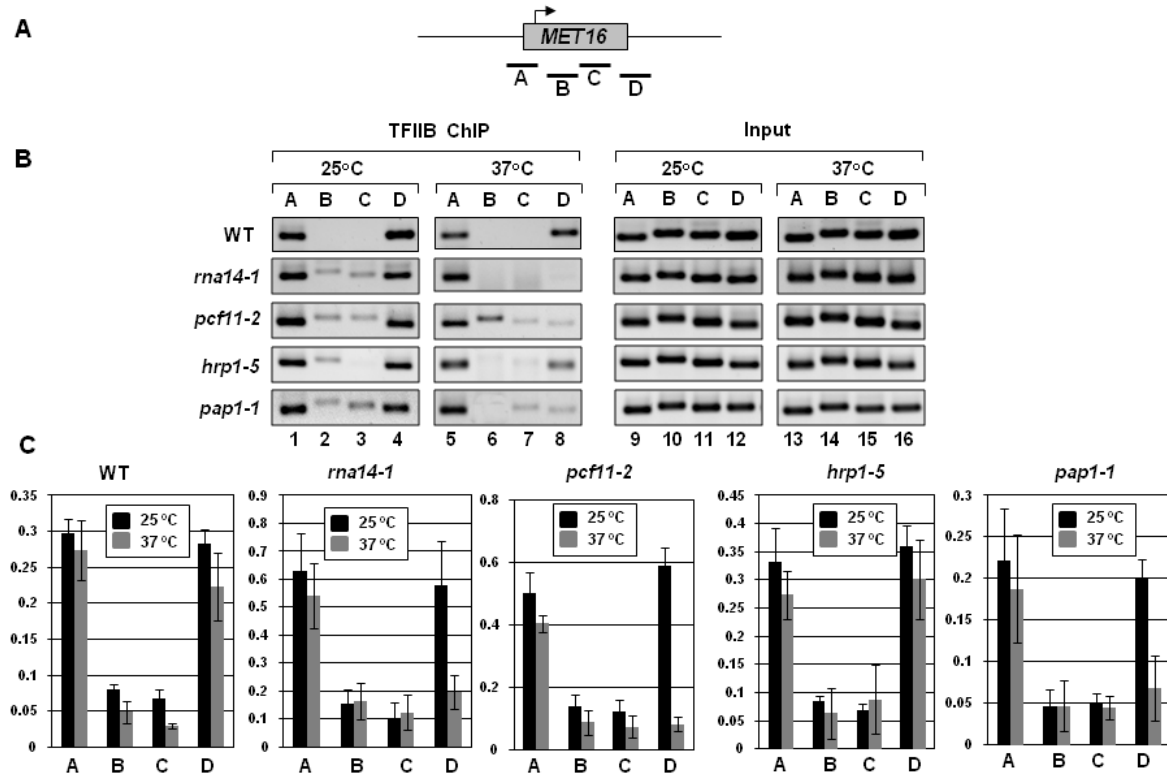

**Figure S5. TFIIB crosslinking to the terminator region is dependent upon a functional CF1 complex and poly (A) polymerase.** *A*, Schematic depiction of *MET16* indicating the position of ChIP primer pairs A, B, C and D. *B*, ChIP analysis showing crosslinking of TFIIB to different regions of *MET16* in W303-1a (wild type) and mutant strains of Rna14 (*rna14-1*), Pcf11 (*pcf11-2*), Hrp1 (*hrp1-5*) and poly (A) polymerase (*pap1-1*) following 120 min. of induction followed by incubation at either permissive (25°C) or nonpermissive (37°C) temperatures. The *Input* signal represents DNA prior to immunoprecipitation. *C*, Quantification of the data shown in *B*, representing ChIP signal/Input signal.
